# Supplementary material for: Water Sorption in Glassy Polyvinylpyrrolidone-Based Polymers
Source: MDPI journal article supplement (doi:10.3390/membranes12040434), 2022-04-17
Supplement: s1 [file s1]

# Water Sorption in Glassy Polyvinylpyrrolidone-based Polymers

Dominik Borrmann <sup>1</sup>, Andreas Danzer <sup>1</sup> and Gabriele Sadowski <sup>1,\*</sup>

<sup>1</sup> Department of Chemical and Biochemical Engineering, Laboratory of Thermodynamics, TU Dortmund University, Emil-Figge-Str. 70, D-44227 Dortmund, Germany; dominik.borrmann@tu-dortmund.de (D.B.); andreas.danzer@tu-dortmund.de (A.D.)

\* Correspondence: Tel.: +49-231-755-2635; gabriele.sadowski@tu-dortmund.de

## 1. Uncertainty of the water-sorption kinetics' fittings

The uncertainty of the fittings of Equation 9 with the measured water-sorption kinetics of the main manuscript was evaluated by the average relative deviation *ARD* as displayed in Equation S1.

$$ARD = \frac{1}{n_t} \sum_k^{n_t} \frac{|w_{w,k} - w_{w,k}^{exp}|}{w_{w,k}^{exp}} \quad (S1)$$

Here, *k* is the index for the number of data points *n<sub>t</sub>* of the water sorption kinetics, *w<sub>w,k</sub><sup>exp</sup>* is the measured water weight fraction and *w<sub>w,k</sub>* is the modeled water weight fraction determined from Equation 9 of the main manuscript. The ARDs of all water sorption kinetics are displayed in Table S1.

Moreover, the sorption steps of the main manuscript were terminated after 200/120 min assuming a (pseudo-) equilibrium of the polymer-water mixture at the respective relative humidity RH. The validity of this (pseudo-)equilibrium was evaluated via a comparison of an average sorption rate *SR<sup>∞</sup>* in this (pseudo-)equilibrium and the initial sorption rate *SR<sup>0</sup>*. The sorption rate describes the rate of change of the measured water weight fractions *w<sub>w,k</sub><sup>exp</sup>*. The *SR<sup>∞</sup>* was calculated as displayed in Equation S2.

$$SR^\infty = \frac{1}{n_t^*} \sum_{k=1}^{n_t-1} \frac{w_{w,k+1}^{exp} - w_{w,k}^{exp}}{t_{k+1} - t_k} \quad \forall k \quad t_k > 60 \text{ min} \quad (S2)$$

*n<sub>t</sub><sup>\*</sup>* is the number of data points where the time *t<sub>k</sub>* of the *k*th data point is greater than 60 min. We estimated that the water sorption kinetics reached a (pseudo-)equilibrium at around 60 min. An average of all sorption rates was taken to prevent a bias resulting from the scattering of *w<sub>w,k</sub><sup>exp</sup>*. The initial sorption rate *SR<sup>0</sup>* was calculated as displayed in Equation S3.

$$SR^0 = \frac{w_{w,2}^{exp} - w_{w,1}^{exp}}{t_2 - t_1} \quad (S3)$$

Both *SR<sup>∞</sup>* and *SR<sup>0</sup>* are also displayed in Table S1.

**Table S1.** Average relative deviation ARD from the water sorption kinetics' fittings at 25 °C of the main manuscript, average sorption rates in (pseudo-) equilibrium *SR<sup>∞</sup>* and initial sorption rates *SR<sup>0</sup>* at the respective relative humidity RH.

| RH<br>/10 <sup>-2</sup> | ARD <sub>PVP</sub><br>/10 <sup>-2</sup> | ARD <sub>PVPVA</sub><br>/10 <sup>-2</sup> | SR <sub>PVP</sub> <sup>∞</sup><br>/(μg g <sup>-1</sup> min <sup>-1</sup> ) | SR <sub>PVPVA</sub> <sup>∞</sup><br>/(μg g <sup>-1</sup> min <sup>-1</sup> ) | SR <sub>PVP</sub> <sup>0</sup><br>/(μg g <sup>-1</sup> min <sup>-1</sup> ) | SR <sub>PVPVA</sub> <sup>0</sup><br>/(μg g <sup>-1</sup> min <sup>-1</sup> ) |
|-------------------------|-----------------------------------------|-------------------------------------------|----------------------------------------------------------------------------|------------------------------------------------------------------------------|----------------------------------------------------------------------------|------------------------------------------------------------------------------|
| 9.24                    | 10.500 ± 2.292                          | 10.381 ± 1.484                            | 0.132 ± 0.179                                                              | 0.017 ± 0.024                                                                | 63.39 ± 2.45                                                               | 30.01 ± 4.88                                                                 |

|      |                   |                   |                   |                   |                    |                    |
|------|-------------------|-------------------|-------------------|-------------------|--------------------|--------------------|
| 29.4 | $2.816 \pm 0.475$ | $2.813 \pm 0.191$ | $0.212 \pm 0.137$ | $0.073 \pm 0.066$ | $104.86 \pm 35.37$ | $86.67 \pm 12.20$  |
| 44.5 | $0.845 \pm 0.117$ | $1.108 \pm 0.107$ | $0.169 \pm 0.102$ | $0.166 \pm 0.026$ | $72.89 \pm 11.33$  | $41.90 \pm 5.216$  |
| 59.9 | $1.018 \pm 0.067$ | $1.033 \pm 0.046$ | $0.165 \pm 0.281$ | $< 0.001$         | $88.65 \pm 31.16$  | $47.29 \pm 8.42$   |
| 73.4 | $0.705 \pm 0.054$ | $1.047 \pm 0.031$ | $0.126 \pm 0.191$ | $< 0.001$         | $103.02 \pm 13.92$ | $79.87 \pm 11.49$  |
| 87.8 | $0.517 \pm 0.057$ | $0.597 \pm 0.048$ | $0.028 \pm 0.351$ | $0.08 \pm 0.456$  | $204.96 \pm 49.37$ | $240.28 \pm 13.01$ |

The ARDs decrease from 10% to 0.5% with increasing RH, supporting that anomalous sorption behavior occurs mostly in the glassy polymer-water mixtures. The very high ARD of 10% for the lowest RH step limits the significance of the determined water diffusion coefficient in the main manuscript.

All average sorption rates in (pseudo-) equilibrium  $SR^\infty$  were lower than  $0.212 \mu\text{g g}^{-1} \text{min}^{-1}$ . In contrast, the initial sorption rate  $SR^0$  (with  $30\text{--}240 \mu\text{g g}^{-1} \text{min}^{-1}$ ) is several magnitudes more significant than the  $SR^\infty$ , showing that the polymer-water mixtures were in a (pseudo-)equilibrium after 60 min.
